# Supplementary material
Source: publisher site journal article supplement (http://e-cmh.org/upload/media/cmh-2020-0261-suppl2.xlsx)
Supplement: Supplementary file 1 [file cmh-2020-0261-suppl2.xlsx]

## Sheet: DEGs
AccID	case	control	FoldChange	Log2FC	P-Value	FDR	HFD48	HFD50	HFD51	CHD41	CHD42	CHD43	KeggID	Description
Aqp7	13.3111	0	Inf	20	2.70806e-05	0.00255597	21	6	15	0	0	0	mmu:11832	Aquaporin-7
1700055N04Rik	24.8618	0	Inf	20	3.73454e-06	0.00055734	42	7	31	0	0	0	mmu:73458	Protein 1700055N04Rik
LOC102639175	61.006	0.290463	210.03	7.71445	0.000607403	0.0243813	88	3	107	1	0	0	mmu:102639175	uncharacterized LOC102639175
LOC102632684	55.2715	0.691886	79.8853	6.31986	2.86848e-05	0.00267843	109	16	55	0	1	1	mmu:102632684	uncharacterized LOC102632684
Lingo4	16.3048	0.375116	43.4661	5.44182	0.000299026	0.0151782	32	5	16	0	0	1	mmu:320747	Leucine-rich repeat and immunoglobulin-like domain containing-NOGO receptor-interacting protein 4
LOC102635290	116.953	3.23751	36.1244	5.1749	2.11549e-22	5.27693e-19	165	68	129	4	3	3	mmu:102635290	uncharacterized LOC102635290
Chrm1	11.9882	0.375116	31.9587	4.99814	0.000525206	0.0221836	10	11	14	0	0	1	mmu:12669	Muscarinic acetylcholine receptor M1
Ly6d	1284.72	40.643	31.6099	4.9823	0.00102396	0.0337984	2570	168	1507	54	48	26	mmu:17068	Lymphocyte antigen 6D
Lcn2	15774.4	551.611	28.5969	4.83779	0.000226394	0.0125097	31712	12168	5498	635	657	424	mmu:16819	Neutrophil gelatinase-associated lipocalin
Mogat2	72.3267	2.53989	28.4763	4.83169	6.35751e-06	0.000874082	124	24	84	2	5	1	mmu:233549	2-acylglycerol O-acyltransferase 2
Ephb2	159.026	5.59663	28.4146	4.82856	0.000428676	0.0193915	244	27	242	4	14	0	mmu:13844	Receptor protein-tyrosine kinase
Igdcc4	80.5019	3.12655	25.7478	4.68638	7.1051e-05	0.00537066	143	74	29	6	2	2	mmu:56741	Igdcc4 protein
Ttc39a	155.029	7.00097	22.1439	4.46884	8.15487e-18	1.01709e-14	232	93	156	1	20	1	mmu:230603	Tetratricopeptide repeat protein 39A
Gpnmb	680.419	35.99	18.9058	4.24076	0.000196939	0.0112011	731	238	1147	23	57	30	mmu:93695	Putative uncharacterized protein
Gdf3	51.5793	3.00539	17.1623	4.10117	4.45014e-06	0.000636918	82	19	63	3	2	4	mmu:14562	Growth/differentiation factor 3
Scn5a	14.0238	0.924002	15.1772	3.92383	0.00098372	0.0331229	18	16	7	1	2	0	mmu:20271	Sodium channel voltage-gated type V alpha polypeptide
Chil1	123.119	8.15498	15.0974	3.91623	1.93123e-05	0.001972	130	151	72	11	5	9	mmu:12654	Chitinase-3-like protein 1
Dnah1	42.5987	2.85666	14.9121	3.89841	3.01593e-08	9.23879e-06	59	20	54	2	6	1	mmu:110084	Protein Dnah1
Dpep2	26.7815	1.8217	14.7014	3.87788	0.000341175	0.0164112	38	8	39	3	3	0	mmu:319446	Dipeptidase 2
LOC102632886	22.1352	1.79093	12.3596	3.62756	0.000358422	0.0169974	13	27	22	1	0	4	mmu:102632886	uncharacterized LOC102632886
H19	112.907	9.19332	12.2814	3.61841	0.00146402	0.0430498	157	26	177	1	21	6	mmu:14955	MCG11084
Nptx1	20.4873	1.75889	11.6479	3.542	0.000545805	0.0225837	40	12	13	0	2	3	mmu:18164	Neuronal pentraxin 1
Ms4a14	29.4984	2.53989	11.6141	3.5378	3.62829e-06	0.000550901	43	19	29	2	5	1	mmu:383435	Protein Ms4a14
Cyp17a1	1563.27	137.312	11.3848	3.50903	0.000742998	0.0278603	3017	1203	656	127	169	125	mmu:13074	Steroid 17-alpha-hydroxylase/17,20 lyase
Nlrp1a	19.7043	1.73258	11.3728	3.50751	0.000127125	0.00807177	17	13	29	1	1	3	mmu:195046	NLR family, pyrin domain containing 1a
Cyp2a22	1130.04	106.701	10.5907	3.40473	0.000528105	0.0222198	1307	387	1836	83	76	156	mmu:233005	MCG118150
Sirpb1a	44.2129	4.24043	10.4265	3.38218	0.000716145	0.0271839	72	12	58	2	8	3	mmu:320832	Putative uncharacterized protein
F13a1	74.1182	7.13486	10.3882	3.37687	0.000988456	0.0331275	72	31	125	7	9	6	mmu:74145	Putative uncharacterized protein
Ms4a4a	33.794	3.49593	9.66665	3.27302	0.00139083	0.0415844	41	11	54	4	5	2	mmu:666907	Protein Ms4a4a
Orm3	1160.7	127.077	9.13381	3.19122	3.6229e-28	1.58149e-24	1345	1092	999	145	74	164	mmu:18407	Orm3 protein
Mmp12	450.341	49.8044	9.04219	3.17667	0.000823964	0.029183	444	193	748	41	77	36	mmu:17381	Macrophage metalloelastase
Ccdc120	139.778	15.6419	8.93616	3.15966	0.000756937	0.0280733	232	40	177	23	20	7	mmu:54648	Protein Ccdc120
LOC100038947	48.162	6.07233	7.9314	2.98757	2.15472e-05	0.0021377	58	23	68	10	10	0	mmu:100038947	signal-regulatory protein beta 1-like
Cenpe	20.6041	2.65658	7.75588	2.95529	0.000330755	0.0160685	30	8	27	2	3	3	mmu:229841	Kinesin-like protein
Ms4a7	138.083	17.8722	7.72615	2.94975	0.000364186	0.0171156	155	57	216	13	22	19	mmu:109225	Protein Ms4a7
B430212C06Rik	40.8774	5.37724	7.60192	2.92636	0.000709276	0.0270898	22	36	60	6	2	8	mmu:338360	RIKEN cDNA B430212C06 gene
Sult1e1	55.4712	7.31901	7.57906	2.92202	0.00136299	0.0411039	61	22	89	0	16	6	mmu:20860	Estrogen sulfotransferase, testis isoform
Gzmk	24.3779	3.28439	7.42234	2.89187	0.000245344	0.0131814	26	26	19	0	8	2	mmu:14945	Gzmk protein
Gpr141	25.697	3.46516	7.41582	2.89061	0.000115981	0.00752842	37	10	34	2	2	6	mmu:353346	Putative uncharacterized protein
LOC102634525	22.7511	3.23304	7.03705	2.81497	0.000187736	0.0108545	30	10	31	1	1	7	mmu:102634525	uncharacterized LOC102634525
Extl1	498.312	73.4246	6.78672	2.76272	4.04568e-20	7.84907e-17	661	426	412	121	19	86	mmu:56219	Exostoses (Multiple)-like 1
Rcan2	640.793	98.2844	6.51979	2.70482	2.28018e-10	1.13755e-07	551	523	817	139	94	75	mmu:53901	Down syndrome critical region gene 1-like 1, isoform CRA_a
Gm7262	69.0991	10.6456	6.49084	2.6984	0.000358302	0.0169974	76	32	105	6	21	6		MAS-related GPR, member B2 pseudogene
Chst11	38.8816	6.08844	6.38614	2.67494	0.00136781	0.0411783	55	13	55	4	12	3	mmu:58250	Uncharacterized protein
Atf3	211.479	33.1242	6.38443	2.67456	0.000886441	0.0307106	378	76	225	28	41	32	mmu:11910	Activating transcription factor 3
Dfna5	29.0332	4.56867	6.35485	2.66786	9.9715e-05	0.00678434	44	18	28	6	3	5	mmu:54722	Non-syndromic hearing impairment protein 5 homolog
Myom3	108.61	17.2855	6.2833	2.65152	6.43387e-05	0.00501526	77	122	110	9	25	18	mmu:242702	Myomesin-3
Gpr98	327.189	52.3388	6.25137	2.64417	4.54955e-09	1.76533e-06	465	297	222	60	51	50	mmu:110789	G-protein-coupled receptor 98
Gm19619	207.958	33.2758	6.24951	2.64374	0.00109519	0.0356109	353	71	242	59	32	16	mmu:100503265	predicted gene, 19619
Clec5a	29.0973	4.7104	6.17726	2.62697	0.000124562	0.00797525	47	13	32	6	7	2	mmu:23845	C-type lectin domain family 5 member A
Svep1	46.8028	7.65171	6.11665	2.61274	8.60552e-06	0.00113834	59	23	63	7	13	4	mmu:64817	Sushi, von Willebrand factor type A, EGF and pentraxin domain-containing protein 1
Baiap3	26.8329	4.5572	5.88801	2.55778	0.000302273	0.0152543	37	19	26	2	9	3	mmu:545192	BAI1-associated protein 3
1810053B23Rik	67.8324	11.6486	5.82325	2.54182	1.26878e-07	3.30658e-05	94	53	59	4	26	6	mmu:69857	RIKEN cDNA 1810053B23 gene
H2-Q1	637.756	111.62	5.71365	2.51441	1.64216e-17	1.79211e-14	657	465	791	115	106	119	mmu:15006	Protein H2-Q1
Clec4d	22.4912	3.94997	5.69401	2.50945	0.000944936	0.032261	33	16	20	1	8	3	mmu:17474	C-type lectin domain family 4, member d
Themis	299.184	52.5782	5.69027	2.5085	8.54676e-07	0.000175571	247	253	379	23	17	108	mmu:210757	Protein THEMIS
G530011O06Rik	39.7853	7.13486	5.57618	2.47928	0.000118766	0.00768063	68	19	39	7	9	6	mmu:654820	RIKEN cDNA G530011O06 gene
Fgf11	28.0641	5.08105	5.52329	2.46553	0.000300168	0.015192	40	27	17	3	5	7	mmu:14166	Fibroblast growth factor 11
Flt3	35.4375	6.49559	5.45562	2.44774	6.79867e-05	0.00518391	46	21	42	5	10	5	mmu:14255	Receptor protein-tyrosine kinase
Ifi27l2b	574.463	106.104	5.41414	2.43673	1.4359e-11	8.95439e-09	794	333	649	145	112	76	mmu:217845	Interferon alpha-inducible protein 27-like protein 2B
Slc22a27	222.683	43.0358	5.17438	2.37138	2.28512e-09	9.50013e-07	272	130	281	60	24	48	mmu:171405	Protein Slc22a27
Morc4	156.033	30.8437	5.05884	2.33881	0.000472997	0.0207512	247	61	187	51	21	25	mmu:75746	Microrchidia 4
Stap1	105.498	21.3636	4.93823	2.30399	3.06497e-06	0.000490986	172	61	97	14	25	25	mmu:56792	Stap1 protein
Egr2	29.705	6.03582	4.92145	2.29908	0.000512952	0.0219526	33	16	42	6	10	3	mmu:13654	E3 SUMO-protein ligase EGR2
Gins2	23.581	4.80078	4.91192	2.29629	0.00160932	0.0457285	32	13	28	7	4	4	mmu:272551	DNA replication complex GINS protein PSF2
Ptk6	27.3971	5.6242	4.87129	2.2843	0.00150122	0.043834	34	31	15	2	10	5	mmu:20459	Non-specific protein-tyrosine kinase
Hk2	203.61	43.4438	4.68675	2.22859	5.3389e-05	0.0043562	236	103	288	54	45	36	mmu:15277	Hexokinase-2
Rad51b	414.793	90.3765	4.58961	2.19837	2.60552e-06	0.000441752	639	262	385	201	56	38	mmu:19363	DNA repair protein RAD51 homolog 2
Rasl10b	64.7787	14.1749	4.56997	2.19218	6.32438e-05	0.00499684	101	30	73	10	19	14	mmu:276952	Ras-like protein family member 10B
Smpd3	355.756	78.0077	4.56053	2.1892	9.06233e-05	0.00643241	539	165	414	39	143	57	mmu:58994	Sphingomyelin phosphodiesterase 3
Aim1l	267.483	58.7779	4.55074	2.1861	3.34612e-08	9.9028e-06	237	216	338	57	35	83	mmu:230806	Absent in melanoma 1-like
Tceal8	573.76	129.643	4.42568	2.1459	2.56177e-05	0.00245694	559	354	821	114	120	156	mmu:66684	Transcription elongation factor A protein-like 8
Slc13a3	1251.26	287.044	4.35913	2.12404	0.00169257	0.0474483	1969	1208	594	409	241	245	mmu:114644	Solute carrier family 13 member 3
Ms4a4c	40.3448	9.2746	4.35004	2.12103	0.000149074	0.00912013	40	25	57	9	8	11	mmu:64380	Protein Ms4a4c
Slpi	55.4958	12.9155	4.29685	2.10328	3.37881e-05	0.00299479	75	37	58	17	24	1	mmu:20568	Antileukoproteinase
Trim7	266.386	62.5927	4.25586	2.08945	1.06537e-11	7.15476e-09	300	197	305	53	59	76	mmu:94089	Tripartite motif protein 7, isoform CRA_a
Ankrd2	43.8642	10.3096	4.25471	2.08906	0.000161118	0.00960165	42	47	38	8	11	12	mmu:56642	Ankyrin repeat domain-containing protein 2
5430435G22Rik	118.243	27.8053	4.25255	2.08833	1.59435e-06	0.000291612	141	66	156	22	38	25	mmu:226421	Protein 5430435G22Rik
Slamf7	98.3528	23.2789	4.22498	2.07894	0.0010054	0.0335665	86	60	150	22	32	18	mmu:75345	SLAM family member 7, isoform CRA_c
Pstpip1	39.0902	9.26887	4.21737	2.07634	0.000280338	0.0144395	42	34	40	7	11	10	mmu:19200	Proline-serine-threonine phosphatase-interacting protein 1
Ddit4	268.302	64.9882	4.12847	2.04561	2.4247e-11	1.41126e-08	380	195	245	70	64	65	mmu:74747	DNA-damage-inducible transcript 4
Mefv	69.541	17.1584	4.05288	2.01895	8.1554e-06	0.00108703	80	50	80	17	22	14	mmu:54483	Mefv protein
Abcb1a	385.966	95.7527	4.03086	2.01109	0.000984524	0.0331229	508	160	539	137	76	85	mmu:18671	Multidrug resistance protein 1A
Emp1	139.091	35.3505	3.93461	1.97622	0.000159735	0.00956484	154	75	197	34	52	24	mmu:13730	Epithelial membrane protein 1
Slamf9	72.5355	18.5	3.92085	1.97117	0.00140253	0.0417504	69	41	110	11	27	18	mmu:98365	CD84-H1
Ms4a6c	323.56	83.9751	3.85304	1.946	3.73252e-07	8.57547e-05	387	186	419	104	75	80	mmu:73656	Ms4a6c protein
Glipr1	75.8813	19.7246	3.84703	1.94375	8.76835e-06	0.00114257	84	57	87	18	28	15	mmu:73690	Glioma pathogenesis-related protein 1
B930041F14Rik	47.8184	12.4743	3.83335	1.9386	0.000360083	0.0169974	79	23	49	10	16	12	mmu:230991	Putative uncharacterized protein
Ptpn7	47.3941	12.4011	3.82175	1.93423	0.000184173	0.0107195	46	30	67	15	10	13	mmu:320139	Protein-tyrosine-phosphatase
Cd8a	80.0685	21.2489	3.76813	1.91385	1.3646e-05	0.00147996	70	67	99	19	39	9	mmu:12525	T-cell surface glycoprotein CD8 alpha chain
Ptges	44.3904	11.8843	3.73521	1.90119	0.000249518	0.0133237	59	29	48	15	6	15	mmu:64292	Putative uncharacterized protein
1700112E06Rik	40.2552	10.7795	3.73442	1.90088	0.000489958	0.0213345	45	23	55	12	10	11	mmu:76633	Protein 1700112E06Rik
Nlrc4	39.4089	10.6365	3.70505	1.88949	0.000672968	0.0262292	44	24	52	13	11	9	mmu:268973	NLR family CARD domain-containing protein 4
Cd14	268.846	73.0449	3.68056	1.87992	0.00151719	0.0441528	467	123	264	86	57	80	mmu:12475	Monocyte differentiation antigen CD14
Gpr35	100.016	27.2564	3.66945	1.87556	0.000478668	0.020895	138	44	131	21	36	26	mmu:64095	G-protein-coupled receptor 35
Pfkfb4	102.189	27.9072	3.66175	1.87253	2.16064e-06	0.00038108	87	85	129	27	29	29	mmu:270198	6-phosphofructo-2-kinase/fructose-2, 6-bisphosphatase 4 splice isoform 7
Uap1l1	461.935	126.726	3.64514	1.86597	0.000785919	0.0287217	627	200	618	178	135	86	mmu:227620	UDP-N-acetylhexosamine pyrophosphorylase-like protein 1
Ms4a6b	137.54	37.7807	3.64049	1.86413	0.000410267	0.0187041	139	79	200	37	51	29	mmu:69774	Membrane-spanning 4-domains subfamily A member 6B
Igf2bp2	96.0721	26.4386	3.63379	1.86147	3.46031e-06	0.000535661	129	72	91	41	21	21	mmu:319765	Insulin-like growth factor 2 mRNA-binding protein 2
1810011O10Rik	925.859	255.391	3.62526	1.85808	1.33375e-09	5.82217e-07	833	798	1095	294	211	275	mmu:69068	Uncharacterized protein C8orf4 homolog
Myo1f	351.969	97.1503	3.62293	1.85716	1.11371e-05	0.00132611	394	203	478	120	96	85	mmu:17916	Unconventional myosin-If
Scube1	45.8132	12.6687	3.61626	1.8545	0.000794503	0.0288843	46	27	66	8	22	9	mmu:64706	Signal peptide, CUB and EGF-like domain-containing protein 1
H2-DMb1	303.093	84.5569	3.58449	1.84177	0.000100244	0.00678434	324	173	427	99	98	66	mmu:14999	Class II histocompatibility antigen, M beta 1 chain
Col15a1	274.82	76.7875	3.57897	1.83954	1.03152e-09	4.73982e-07	397	178	272	112	58	69	mmu:12819	Collagen alpha-1(XV) chain
Gm5150	67.1353	18.8223	3.5668	1.83463	5.2641e-05	0.00431533	71	44	88	26	19	14	mmu:381484	SIRP beta 1 like 1 protein
Armcx4	176.308	49.5048	3.56143	1.83246	0.000892212	0.0308493	289	79	190	47	67	39	mmu:100503043	Armcx4 protein
Runx3	41.7886	11.7504	3.55635	1.8304	0.000620195	0.024668	46	26	55	9	17	10	mmu:12399	Core binding factor alpha 3 subunit
Amica1	35.2192	9.97221	3.53173	1.82038	0.00171728	0.0478728	35	31	38	11	6	13	mmu:270152	Junctional adhesion molecule-like
Cml5	198.174	56.1401	3.53	1.81967	2.15231e-06	0.00038108	301	139	170	92	23	59	mmu:69049	Probable N-acetyltransferase CML5
Tlr1	166.965	47.4405	3.51947	1.81536	0.000326227	0.0159826	176	94	239	64	52	33	mmu:21897	Toll-like receptor 1
Tlr13	257.373	73.2185	3.51513	1.81358	0.000189155	0.0108637	243	165	367	100	53	73	mmu:279572	Toll-like receptor 13
Mmgt2	61.936	17.6227	3.51456	1.81335	0.000882206	0.0306246	102	50	38	19	24	12	mmu:216829	MCG50403, isoform CRA_b
Endod1	235.715	67.3527	3.49972	1.80724	1.54984e-06	0.000287891	327	129	275	98	60	53	mmu:71946	Putative uncharacterized protein
LOC102638482	80.7097	23.1005	3.49385	1.80482	1.58505e-05	0.00167736	121	61	65	31	22	19	mmu:102638482	uncharacterized LOC102638482
Adrb2	91.2898	26.1322	3.49338	1.80463	0.00111331	0.0359992	156	44	89	33	25	23	mmu:11555	Beta-2 adrenoceptor
Sema4d	138.207	40.7872	3.38849	1.76064	0.00133583	0.0407277	140	76	205	52	42	33	mmu:20354	Semaphorin-4D
Dnph1	164.61	48.7856	3.37416	1.75453	1.24443e-07	3.29226e-05	240	109	158	36	76	38	mmu:381101	2'-deoxynucleoside 5'-phosphate N-hydrolase 1
Nkg7	46.4948	13.8889	3.34763	1.74314	0.000705193	0.027003	48	32	60	12	21	10	mmu:72310	Natural killer cell group 7 sequence, isoform CRA_a
Iqcg	58.0892	17.3655	3.34509	1.74204	0.000312437	0.0155407	52	61	55	18	17	18	mmu:69707	IQ domain-containing protein G
Ms4a6d	191.378	58.1048	3.29367	1.7197	9.66452e-06	0.0011884	255	101	237	62	65	52	mmu:68774	Membrane-spanning 4-domains subfamily A member 6D
Ifi44	176.673	54.1594	3.2621	1.7058	3.20513e-07	7.46198e-05	186	149	190	51	65	50	mmu:99899	Putative uncharacterized protein
Tnfaip3	336.427	103.452	3.25201	1.70133	7.83344e-07	0.000164795	453	189	398	133	117	74	mmu:21929	Tumor necrosis factor alpha-induced protein 3
Abcg3	309.046	95.3196	3.24221	1.69698	5.31635e-09	2.01802e-06	392	195	359	111	89	93	mmu:27405	ATP-binding cassette sub-family G member 3
Cd72	190.854	58.9919	3.23526	1.69388	9.36471e-06	0.0011686	256	103	232	85	55	45	mmu:12517	B-cell differentiation antigen CD72
Slfn8	174.078	53.8783	3.23095	1.69196	6.09691e-06	0.000844906	154	136	226	62	41	61	mmu:276950	Protein Slfn8
Ppp1r3b	7172.19	2234.62	3.20957	1.68238	2.78721e-07	6.66679e-05	6539	7031	7327	2436	1788	2561	mmu:244416	Protein phosphatase 1 regulatory subunit 3B
Kbtbd11	93.5667	29.1993	3.20442	1.68006	2.05835e-05	0.00206557	149	62	79	27	39	24	mmu:74901	Kelch repeat and BTB domain-containing protein 11
Cdkn2c	242.564	75.7856	3.20067	1.67837	1.01755e-07	2.77615e-05	240	203	276	94	82	60	mmu:12580	Putative uncharacterized protein
Atp6v0d2	405.4	126.889	3.19493	1.67578	0.000398659	0.018275	630	222	415	27	197	151	mmu:242341	V-type proton ATPase subunit d 2
Col8a1	40.9522	12.9169	3.17043	1.66468	0.0013906	0.0415844	63	33	29	3	25	11	mmu:12837	Collagen alpha-1(VIII) chain
Oas2	225.435	71.3188	3.16095	1.66036	2.83624e-06	0.000471653	225	154	299	93	70	59	mmu:246728	2'-5'-oligoadenylate synthase 2
Adap1	99.0208	31.4029	3.15324	1.65683	0.000379759	0.0177299	122	50	134	44	28	26	mmu:231821	Adap1 protein
Zbtb16	442.325	140.368	3.15119	1.65589	6.29117e-09	2.28855e-06	470	417	416	194	103	137	mmu:235320	Zbtb16 protein
Kcnj10	145.095	46.0696	3.14948	1.65511	3.01825e-05	0.00280328	137	100	198	54	45	43	mmu:16513	MCG4485, isoform CRA_a
Taf1c	70.7416	22.5094	3.14276	1.65203	0.00010568	0.00707	98	51	67	24	23	22	mmu:21341	TATA box-binding protein-associated factor RNA polymerase I subunit C
Cyp2c39	170.462	54.5453	3.12514	1.64392	1.12402e-05	0.00132611	161	125	223	49	42	72	mmu:13098	Cytochrome P450 2C39
Synj2	289.295	92.9387	3.11275	1.63819	3.24474e-06	0.000515058	448	180	270	115	79	92	mmu:20975	Synaptojanin-2
Lat2	51.8369	16.725	3.09937	1.63198	0.000681523	0.0262977	61	29	69	17	23	12	mmu:56743	Linker for activation of T-cells family member 2
Krt8-ps	66.3281	21.4699	3.08935	1.6273	0.000573625	0.0231748	91	31	85	22	18	25		keratin 8, pseudogene
Nlrp1b	66.7816	21.8219	3.0603	1.61367	0.000564546	0.0230856	69	39	95	27	24	17	mmu:637515	NACHT-, LRR-, and PYD-containing protein 1 paralog b splice variant 3
Ppfia4	106.127	34.6848	3.05975	1.61342	2.36468e-05	0.00230668	125	65	134	46	46	18	mmu:68507	Protein Ppfia4
Itgam	175.132	57.2425	3.05948	1.61328	8.66735e-07	0.000175977	227	128	177	84	35	58	mmu:16409	CD11b
Twf2	134.038	44.0294	3.04429	1.6061	3.84913e-06	0.000569574	187	91	133	46	53	37	mmu:23999	Twinfilin-2
Rasal3	63.9519	21.0569	3.0371	1.6027	0.000344499	0.0165255	79	42	74	32	17	17	mmu:320484	RAS protein activator-like-3
Rgs10	117.433	38.7073	3.03386	1.60116	0.000722345	0.0273598	108	76	169	36	43	39	mmu:67865	Regulator of G-protein-signaling 10
Ccdc66	115.027	37.9295	3.03266	1.60058	0.00133924	0.0407277	198	75	86	38	47	32	mmu:320234	Coiled-coil domain-containing protein 66
Phlda3	52.6514	17.3848	3.02858	1.59864	0.00129798	0.0398313	89	31	45	16	26	12	mmu:27280	Pleckstrin homology-like domain family A member 3
Cd207	439.272	145.603	3.01691	1.59307	1.53181e-08	5.14366e-06	493	355	466	194	129	129	mmu:246278	C-type lectin domain family 4 member K
Gas6	2366.83	785.379	3.01362	1.5915	7.75734e-06	0.00105001	3628	1825	1792	961	890	598	mmu:14456	Growth arrest-specific protein 6
Mmp27	83.0095	27.6269	3.00466	1.5872	0.000100768	0.00679346	94	65	90	31	28	26	mmu:234911	Protein Mmp27
Nfkb2	363.251	120.933	3.00374	1.58676	1.96144e-05	0.00199121	544	200	388	152	137	89	mmu:18034	Putative uncharacterized protein
Clec4a2	121.364	40.9347	2.96481	1.56794	1.19346e-05	0.00135262	155	68	151	54	43	31	mmu:26888	ASL1/Clec4a2 fusion protein
Slc25a27	82.3769	27.8039	2.96279	1.56695	0.000135745	0.00852608	131	52	73	36	37	15	mmu:74011	Putative uncharacterized protein
LOC102639424	78.0842	26.3995	2.95779	1.56452	0.000451673	0.020119	103	77	52	39	31	14	mmu:102639424	uncharacterized LOC102639424
Ly9	171.582	58.0212	2.95724	1.56425	0.000167435	0.00991043	198	95	233	75	54	51	mmu:17085	T-lymphocyte surface antigen Ly-9
Pla2g7	472.869	160.178	2.95214	1.56176	6.22695e-05	0.00494222	505	290	641	210	126	158	mmu:27226	Phospholipase A2, group VII (Platelet-activating factor acetylhydrolase, plasma), isoform CRA_b
Irak3	134.465	45.6156	2.94778	1.55963	8.04585e-06	0.00108068	180	103	125	57	42	42	mmu:73914	Interleukin-1 receptor-associated kinase 3
Myof	286.402	97.9292	2.92458	1.54823	0.000313288	0.0155407	387	141	363	130	81	92	mmu:226101	Myof protein
Gcnt1	52.2185	17.9246	2.91323	1.54262	0.00112296	0.0361106	78	24	62	24	18	14	mmu:14537	Beta-1,3-galactosyl-O-glycosyl-glycoprotein beta-1,6-N-acetylglucosaminyltransferase
Prdm1	57.1203	19.6618	2.90514	1.53861	0.000611357	0.0244363	69	30	77	15	27	18	mmu:12142	PR domain containing 1 with ZNF domain
Fyb	778.169	269.607	2.88632	1.52923	5.53933e-08	1.58561e-05	1005	464	923	318	254	258	mmu:23880	FYN binding protein, isoform CRA_f
Samd9l	841.946	293.017	2.87337	1.52275	1.38392e-09	5.89382e-07	1041	547	981	258	287	339	mmu:209086	Sterile alpha motif domain-containing protein 9-like
Eif4e3	343.845	120.201	2.86058	1.51631	2.18685e-07	5.37811e-05	357	239	439	112	124	129	mmu:66892	Eukaryotic translation initiation factor 4E type 3
Sorl1	162.747	57.0403	2.8532	1.51258	0.00138202	0.041463	210	76	220	60	54	60	mmu:20660	Sortilin-related receptor
Oas1a	187.548	65.7722	2.85148	1.51171	0.000149382	0.00912013	166	139	253	89	68	49	mmu:246730	2'-5'-oligoadenylate synthase 1A
Cidec	649.892	228.338	2.84618	1.50903	0.000553389	0.0227392	852	331	832	354	144	213	mmu:14311	Cell death activator CIDE-3
LOC102639543	66.5489	23.4334	2.83992	1.50585	0.00134019	0.0407277	67	39	96	25	25	22	mmu:102639543	pyrin domain-containing protein 3-like
Gck	3293.83	1161.37	2.83617	1.50394	1.30536e-06	0.000253254	3052	2937	3695	1530	641	1370	mmu:103988	Glucokinase, isoform CRA_a
Mpeg1	6942.94	2452.48	2.83099	1.50131	2.83061e-08	8.82593e-06	6394	5752	8381	2583	2682	2273	mmu:17476	Macrophage-expressed gene 1 protein
Slamf8	72.9105	25.9803	2.80638	1.48871	0.000267395	0.013979	100	47	77	28	22	29	mmu:74748	SLAM family member 8
Ophn1	71.7525	25.6257	2.80002	1.48544	0.000308309	0.0153997	93	45	82	25	26	27	mmu:94190	Oligophrenin-1
Fxyd5	262.458	93.8086	2.79781	1.4843	4.95226e-06	0.00069735	359	148	305	100	118	73	mmu:18301	FXYD domain-containing ion transport regulator 5, isoform CRA_c
Syt11	93.1761	33.3858	2.79089	1.48072	9.9968e-05	0.00678434	139	56	94	32	50	22	mmu:229521	Synaptotagmin-11
Mbnl3	55.0887	19.7991	2.78239	1.47632	0.00112878	0.0361597	66	35	67	12	29	19	mmu:171170	Muscleblind-like protein 3
Osbpl7	65.7325	23.6406	2.78049	1.47534	0.00049397	0.0213495	78	54	65	13	26	31	mmu:71240	Oxysterol-binding protein
Tmprss2	268.634	96.6353	2.77987	1.47502	2.97173e-06	0.000480458	364	161	303	93	144	64	mmu:50528	Putative uncharacterized protein
Slc17a4	1003.1	361.242	2.77681	1.47343	9.84658e-05	0.00678434	1515	537	1080	378	448	292	mmu:319848	Probable small intestine urate exporter
Cdcp1	190.182	68.5091	2.77601	1.47301	0.000237176	0.0128285	262	106	221	42	115	53	mmu:109332	Cdcp1 protein
Clec4a3	187.018	67.5179	2.7699	1.46984	2.40431e-06	0.000419817	249	115	211	67	70	69	mmu:73149	Dendritic cell inhibitory receptor 3
Pak1	158.164	57.1498	2.76753	1.4686	9.36965e-06	0.0011686	190	102	190	72	54	51	mmu:18479	Non-specific serine/threonine protein kinase
Adcy7	321.479	116.23	2.76589	1.46774	3.22627e-05	0.00293405	350	198	429	121	134	103	mmu:11513	Adenylate cyclase type 7
Casp4	105.514	38.2316	2.75986	1.4646	4.44145e-05	0.00374648	146	62	118	30	47	39	mmu:12363	Caspase-11 short form splicing variant
Blnk	110.533	40.1127	2.75555	1.46234	4.8578e-05	0.00405847	174	67	103	45	38	40	mmu:17060	B-cell linker protein
Gm8941	957.779	347.615	2.75528	1.4622	0.000285901	0.0146396	947	951	900	458	109	480		glyceraldehyde-3-phosphate dehydrogenase pseudogene
Gm8995	382.717	139.148	2.75042	1.45965	2.08685e-07	5.2055e-05	415	290	443	196	76	155	mmu:668139	predicted gene 8995
Ccr5	403.325	147.36	2.737	1.4526	3.22567e-05	0.00293405	434	263	524	234	118	112	mmu:12774	C-C chemokine receptor type 5
Dock11	89.489	32.6976	2.73687	1.45253	0.000200419	0.0113621	100	60	111	42	28	31	mmu:75974	Dedicator of cytokinesis protein 11
Ier5	277.395	101.942	2.72111	1.4442	0.0014645	0.0430498	456	143	274	102	130	83	mmu:15939	Immediate early response gene 5 protein
P2ry14	67.3064	24.7543	2.71897	1.44306	0.000976736	0.032988	93	32	85	22	26	27	mmu:140795	Purinergic receptor P2Y, G-protein coupled, 14, isoform CRA_a
Rorc	3184.05	1176.48	2.70642	1.43639	1.20227e-09	5.38279e-07	4424	2131	3214	1261	933	1372	mmu:19885	Nuclear receptor ROR-gamma
Gbp2	361.213	133.717	2.70132	1.43367	0.000574692	0.0231748	597	220	311	161	117	133	mmu:14469	Interferon-induced guanylate-binding protein 2
Cd48	182.407	67.7509	2.69232	1.42885	0.00031478	0.0155619	208	104	246	93	54	63	mmu:12506	CD48 antigen
Pou2f2	68.2458	25.3788	2.68909	1.42712	0.000664398	0.0259532	79	46	82	29	18	30	mmu:18987	POU domain, class 2, transcription factor 2
Rbl1	89.1515	33.1767	2.68718	1.42609	0.00018739	0.0108545	139	55	83	39	37	27	mmu:19650	Putative uncharacterized protein
Ptprc	821.335	305.719	2.68657	1.42576	1.2487e-05	0.00138207	1042	475	1009	362	227	343	mmu:19264	Receptor-type tyrosine-protein phosphatase C
Ctla2a	139.936	52.2794	2.6767	1.42046	0.00109162	0.0355611	234	83	121	48	63	49	mmu:13024	Protein CTLA-2-alpha
Fam129b	387.503	144.905	2.67419	1.4191	1.05085e-05	0.00128314	430	249	497	154	199	99	mmu:227737	Niban-like protein 1
Prob1	367.87	137.925	2.66717	1.41531	1.1882e-05	0.00135262	312	333	431	143	161	121	mmu:381148	Protein Prob1
Ncf4	136.683	51.2935	2.66473	1.41399	0.000812142	0.0290591	142	82	191	69	43	47	mmu:17972	Neutrophil cytosol factor 4
Pyhin1	155.042	58.4992	2.65033	1.40617	0.0015276	0.0443687	136	108	219	60	74	47	mmu:236312	Pyrin and HIN domain-containing protein 1
Sh2d4a	197.372	74.6001	2.64573	1.40366	0.000333441	0.0160835	200	124	273	76	77	75	mmu:72281	SH2 domain-containing protein 4A
Basp1	73.3808	27.7994	2.63965	1.40035	0.000822417	0.029183	87	49	87	33	35	19	mmu:70350	Brain acid soluble protein 1
Tbc1d31	386.86	146.6	2.63887	1.39992	0.00093859	0.0321347	497	197	504	209	103	142	mmu:210544	TBC1 domain family member 31
Epsti1	150.021	57.0356	2.6303	1.39523	2.17985e-05	0.00213921	185	89	186	70	46	59	mmu:108670	Epithelial-stromal interaction protein 1
Cd36	5708.65	2179.81	2.61888	1.38895	9.40619e-09	3.22042e-06	7151	3636	6665	2634	1733	2308	mmu:12491	CD36 antigen variant
C730036E19Rik	2896.75	1109.56	2.61071	1.38444	0.000867494	0.0302524	2908	3069	2439	1153	700	1474	mmu:402734	RIKEN cDNA C730036E19 gene
Igfbp5	301.176	115.439	2.60897	1.38348	0.000987013	0.0331275	344	312	227	69	178	104	mmu:16011	Insulin-like growth factor-binding protein 5
2810002D19Rik	60.5613	23.3578	2.59276	1.37449	0.00181159	0.0497362	82	46	56	19	35	18	mmu:66457	RIKEN cDNA 2810002D19 gene
Cxcr4	74.7085	28.8197	2.59227	1.37422	0.000740255	0.0278569	76	47	103	24	37	27	mmu:12767	Chemokine receptor 4
Mnda	86.0464	33.1983	2.59189	1.37401	0.000570135	0.0231004	89	56	115	48	30	26	mmu:381308	Interferon-activable protein 205-B
Arhgap9	140.528	54.3402	2.58607	1.37076	3.94635e-05	0.00339444	169	88	172	53	59	54	mmu:216445	ArhGAP9
Clec4a1	176.413	68.4385	2.57768	1.36607	1.54263e-05	0.00164243	227	124	186	77	59	73	mmu:269799	Protein Clec4a1
AI413582	75.5025	29.2929	2.5775	1.36597	0.000808527	0.0289891	100	43	90	32	43	17	mmu:106672	Protein AI413582
Chchd6	105.871	41.174	2.5713	1.3625	0.000208607	0.0117147	123	83	112	43	42	41	mmu:66098	MICOS complex subunit Mic25
Sirpa	1589.92	618.834	2.56921	1.36133	0.000398761	0.018275	1771	916	2168	678	709	526	mmu:19261	Tyrosine-protein phosphatase non-receptor type substrate 1
Ctss	2444.04	956.154	2.55612	1.35396	0.00124892	0.0390814	2833	1303	3372	1176	885	891	mmu:13040	Cathepsin S
Spn	73.2119	28.7018	2.55078	1.35094	0.00110577	0.035888	78	46	98	25	44	20	mmu:20737	Leukosialin
Slc28a2	75.7382	29.7051	2.54967	1.35031	0.000801822	0.0288948	77	59	90	29	21	39	mmu:269346	Concentrative nucleoside transporter 2
Tm6sf1	146.368	57.415	2.5493	1.3501	0.00097536	0.032988	189	76	188	86	42	51	mmu:107769	Transmembrane 6 superfamily member 1, isoform CRA_d
Parvg	102.564	40.5264	2.5308	1.33959	0.00136047	0.041099	139	51	129	41	56	29	mmu:64099	Gamma-parvin
St6galnac4	74.8563	29.5801	2.53063	1.33949	0.000849957	0.0298614	108	51	71	29	36	26	mmu:20448	Putative uncharacterized protein
Limch1	82.5405	32.6195	2.5304	1.33937	0.000897973	0.0309872	95	53	103	38	48	17	mmu:77569	LIM and calponin homology domains-containing protein 1
Arhgap19	331.361	130.991	2.52964	1.33893	0.000998549	0.0334016	379	181	456	148	144	113	mmu:71085	Rho GTPase-activating protein 19
Fgr	201.991	79.8875	2.52844	1.33825	2.73043e-05	0.00256322	209	151	245	100	93	57	mmu:14191	Tyrosine-protein kinase Fgr
Pfkp	123.531	48.901	2.52615	1.33694	0.000111854	0.00730494	169	74	138	69	39	44	mmu:56421	ATP-dependent 6-phosphofructokinase, platelet type
Filip1l	330.682	131.11	2.52218	1.33467	0.000791316	0.0288459	499	164	373	134	143	125	mmu:78749	Filamin A-interacting protein 1-like
Ly86	309.396	122.826	2.51897	1.33284	2.92685e-06	0.000477624	384	191	372	145	134	102	mmu:17084	Lymphocyte antigen 86
Usp18	342.345	136.357	2.51066	1.32807	1.60327e-06	0.000291612	416	228	398	131	141	143	mmu:24110	Ubiquitin carboxyl-terminal hydrolase
Fcgr1	253.573	101.266	2.50403	1.32425	0.000622174	0.0246904	282	147	345	122	119	75	mmu:14129	High affinity immunoglobulin gamma Fc receptor I
Fmnl1	162.187	65.3445	2.48204	1.31152	6.82855e-05	0.00518406	207	112	175	91	66	48	mmu:57778	Formin-like protein 1
Mlkl	201.38	81.2627	2.47814	1.30926	1.72902e-05	0.00180781	258	130	228	100	63	86	mmu:74568	Mixed lineage kinase domain-like protein
Itga4	286.441	115.673	2.47629	1.30818	8.51546e-05	0.00614415	350	162	368	126	117	112	mmu:16401	Integrin alpha-4
Ssbp4	176.943	71.4594	2.47614	1.30809	4.8507e-05	0.00405847	253	151	131	81	85	56	mmu:76900	Single stranded DNA binding protein 4, isoform CRA_b
Ace	91.2835	36.9034	2.47358	1.3066	0.000542659	0.0225547	133	50	101	45	48	23	mmu:11421	Angiotensin-converting enzyme
Pik3r5	104.972	42.4901	2.47051	1.30481	0.000458504	0.0201661	108	76	131	63	29	40	mmu:320207	Phosphoinositide-3-kinase, regulatory subunit 5, p101
Evi2b	104.571	42.6045	2.45447	1.29541	0.000439507	0.0197789	112	70	134	52	43	37	mmu:216984	Protein EVI2B
Plcb2	116.534	47.5514	2.4507	1.29319	0.000303525	0.0152734	135	73	147	62	53	34	mmu:18796	1-phosphatidylinositol 4,5-bisphosphate phosphodiesterase beta-2
Csf3r	214.181	87.5233	2.44713	1.29109	3.37688e-05	0.00299479	246	153	248	132	70	72	mmu:12986	Granulocyte colony-stimulating factor receptor
Slc8a1	163.915	67.2497	2.43741	1.28535	0.00033129	0.0160685	220	87	201	81	80	49	mmu:20541	Sodium/calcium exchanger 1
Sash3	122.188	50.2697	2.43064	1.28134	0.000260364	0.0137348	144	75	154	55	68	34	mmu:74131	SAM and SH3 domain-containing protein 3
Plac8	296.271	122.286	2.42276	1.27665	1.08795e-05	0.00131012	338	214	342	137	142	100	mmu:231507	Placenta-specific gene 8 protein
Dapp1	68.5484	28.5363	2.40215	1.26433	0.00151692	0.0441528	92	38	82	24	29	33	mmu:26377	Dual adapter for phosphotyrosine and 3-phosphotyrosine and 3-phosphoinositide
Ccdc88b	114.906	47.8693	2.40042	1.26328	0.000392842	0.0180987	151	67	136	74	43	34	mmu:78317	Coiled-coil domain-containing protein 88B
Dock10	381.714	159.125	2.39884	1.26233	3.66159e-06	0.000551164	462	238	466	187	126	173	mmu:210293	Dedicator of cytokinesis protein 10
Bin2	192.317	80.4523	2.39045	1.25728	5.36608e-05	0.004358	278	120	196	108	91	54	mmu:668218	Bridging integrator 2
Vldlr	220.183	92.2216	2.38755	1.25553	3.44412e-05	0.003022	274	158	236	128	66	91	mmu:22359	Very low-density lipoprotein receptor
Pdgfb	111.518	46.7343	2.3862	1.25472	0.0017774	0.0492249	162	57	129	30	62	49	mmu:18591	Platelet-derived growth factor subunit B
Anxa3	182.642	76.9237	2.37433	1.24752	8.57337e-05	0.00616048	202	129	220	97	71	70	mmu:11745	Annexin A3
Il18bp	905.191	382.797	2.36468	1.24164	2.71901e-06	0.000456506	1283	547	967	450	437	303	mmu:16068	Interleukin-18-binding protein
Pck2	166.721	70.5551	2.363	1.24062	0.000517882	0.0220555	267	103	149	84	64	69	mmu:74551	Pck2 protein
Gm12250	97.7697	41.3902	2.36215	1.2401	0.000745215	0.0278603	114	72	109	37	47	42	mmu:631323	Interferon-gamma-inducible p47 GTPase
Evi2a-evi2b	119.098	50.4312	2.3616	1.23977	0.000435562	0.0196521	125	78	157	59	53	44	mmu:101488212	Protein Gm21975
Cpeb1	227.307	96.4624	2.35643	1.2366	0.000127728	0.00808065	317	125	263	104	86	104	mmu:12877	Cytoplasmic polyadenylation element-binding protein 1
Sh3kbp1	154.415	65.6646	2.35157	1.23362	0.000802589	0.0288948	166	95	208	82	80	44	mmu:58194	SH3 domain-containing kinase-binding protein 1
Nckap1l	593.266	252.692	2.34778	1.2313	1.85182e-05	0.00192468	721	354	742	312	244	226	mmu:105855	Putative uncharacterized protein
Cyth4	431.368	183.991	2.34451	1.22928	4.21997e-06	0.0006192	592	261	477	200	221	149	mmu:72318	Cyth4 protein
Fblim1	122.634	52.3293	2.3435	1.22866	0.00114094	0.0363538	169	64	148	61	69	34	mmu:74202	Filamin-binding LIM protein 1
Plek	388.113	166.713	2.32803	1.21911	0.00110831	0.0359039	549	202	457	243	159	122	mmu:56193	Pleckstrin
Map3k14	219.542	94.4536	2.32433	1.21682	7.86354e-05	0.00589293	255	170	235	136	74	84	mmu:53859	Map3k14 protein
Selplg	176.666	76.1471	2.32006	1.21416	0.000151573	0.00921741	191	126	215	98	70	68	mmu:20345	Selectin, platelet (P-selectin) ligand, isoform CRA_b
Pirb	336.5	146.016	2.30454	1.20448	2.44511e-05	0.00237189	361	236	417	210	118	127	mmu:18733	Lilrb3 protein
Lgalsl	528.482	229.9	2.29875	1.20085	4.87413e-06	0.000691928	752	372	495	230	310	173	mmu:216551	Galectin-related protein
Nfkbie	135.901	59.1281	2.29841	1.20064	0.000326773	0.0159826	181	83	154	70	68	46	mmu:18037	NF-kappa-B inhibitor epsilon
Inpp5d	310.268	135.077	2.29698	1.19974	2.63855e-05	0.0025039	397	193	361	186	141	97	mmu:16331	Phosphatidylinositol 3,4,5-trisphosphate 5-phosphatase 1
2610034B18Rik	254.871	111.26	2.29077	1.19583	5.6376e-05	0.00455732	299	207	258	116	130	97	mmu:70420	Arpin
Kifap3	217.365	95.5698	2.27441	1.18549	8.72403e-05	0.00621756	285	158	218	111	104	81	mmu:16579	Kinesin-associated protein 3
Il2rg	178.574	78.6664	2.27001	1.1827	0.000217187	0.012116	208	138	191	103	71	70	mmu:16186	Cytokine receptor common subunit gamma
Spp1	1464.71	646.132	2.26689	1.18071	6.4724e-05	0.00502099	1981	827	1720	783	706	520	mmu:20750	Osteopontin
Clca1	358.115	157.982	2.26681	1.18067	0.000173546	0.0102374	506	203	401	220	162	114	mmu:12722	Chloride channel calcium activated 1
Slfn2	278.723	123.338	2.25984	1.17622	0.000815619	0.0291238	303	168	377	149	113	118	mmu:20556	Schlafen 2
Cxcl16	526.694	233.233	2.25822	1.17519	0.0005702	0.0231004	560	327	711	237	262	217	mmu:66102	CXCL16v1
Psd4	249.83	110.712	2.25658	1.17413	5.81442e-05	0.00465714	354	180	230	108	151	84	mmu:215632	PH and SEC7 domain-containing protein 4
Abcc5	315.835	140.571	2.2468	1.16787	0.000725299	0.0274122	392	172	409	166	153	117	mmu:27416	Multidrug resistance-associated protein 5
Dqx1	288.791	128.79	2.24234	1.165	0.000143628	0.00888172	281	221	359	97	185	112	mmu:93838	ATP-dependent RNA helicase DQX1
Plcg2	168.835	75.3065	2.24198	1.16477	0.000254763	0.0134801	212	112	191	97	73	64	mmu:234779	1-phosphatidylinositol 4,5-bisphosphate phosphodiesterase gamma-2
Wnt5b	275.428	123.554	2.22921	1.15653	8.06447e-05	0.00594151	319	253	245	130	124	124	mmu:22419	Protein Wnt-5b
Clec12a	378.862	170.604	2.22071	1.15102	5.20417e-05	0.00428632	418	245	486	225	157	148	mmu:232413	C-type lectin domain family 12 member A
Dock2	291.632	131.354	2.22019	1.15069	0.000251248	0.0133751	320	182	384	164	121	121	mmu:94176	Dedicator of cytokinesis protein 2
Gpr65	127.222	57.3121	2.21981	1.15044	0.000745352	0.0278603	151	80	157	69	62	47	mmu:14744	Putative uncharacterized protein
Lonrf3	275.312	124.096	2.21854	1.14961	0.00112543	0.0361232	386	174	288	149	55	169	mmu:74365	LON peptidase N-terminal domain and RING finger protein 3
S1pr2	275.096	124.318	2.21284	1.1459	6.52749e-05	0.00502099	356	163	327	177	107	104	mmu:14739	Sphingosine 1-phosphate receptor 2
Sp140	158.797	71.907	2.20837	1.14298	0.000333286	0.0160835	178	110	192	70	74	75	mmu:434484	Protein Sp140
Tifab	202.894	91.95	2.20657	1.1418	0.00164308	0.0465744	223	121	274	119	103	66	mmu:212937	TRAF-interacting protein with FHA domain-containing protein B
Igsf6	289.316	131.216	2.20489	1.1407	0.00083631	0.0295006	311	177	391	155	130	120	mmu:80719	Immunoglobulin superfamily member 6
Myo1g	121.283	55.0203	2.20433	1.14034	0.00104244	0.0343401	148	78	144	75	54	43	mmu:246177	Unconventional myosin-Ig
Gbp3	330.823	150.108	2.2039	1.14006	0.00068194	0.0262977	298	322	344	159	109	185	mmu:55932	Guanylate-binding protein 4
Btnl9	106.07	48.4631	2.18867	1.13005	0.00161062	0.0457285	165	60	106	66	38	46	mmu:237754	Butyrophilin-like protein 9
Ptplad2	145.965	66.86	2.18314	1.12641	0.000502587	0.0216595	185	84	180	73	79	55	mmu:66775	Very-long-chain (3R)-3-hydroxyacyl-CoA dehydratase 4
Pik3cd	307.72	141.483	2.17496	1.12099	5.09787e-05	0.00423876	396	186	363	157	144	134	mmu:18707	Phosphatidylinositol 4,5-bisphosphate 3-kinase catalytic subunit delta isoform
Slfn5	720.131	331.754	2.17068	1.11815	1.18874e-05	0.00135262	743	526	891	348	309	354	mmu:327978	Schlafen family member 5
Evl	267.92	123.972	2.16114	1.11179	0.000107817	0.00713102	337	157	329	155	132	99	mmu:14026	Ena/VASP-like protein
Gm10282	152.836	70.9365	2.15455	1.10738	0.000364641	0.0171156	215	118	132	47	79	86	mmu:100042405	high mobility group nucleosomal binding domain 2 pseudogene
Fcer1g	464.914	215.787	2.1545	1.10735	3.31264e-05	0.00297908	557	302	557	230	269	170	mmu:14127	High affinity immunoglobulin epsilon receptor subunit gamma
P2ry13	235.797	109.549	2.15243	1.10597	0.000249142	0.0133237	238	185	280	143	88	107	mmu:74191	P2Y purinoceptor 13
Galnt10	282.162	131.244	2.14991	1.10428	9.28647e-05	0.00653835	371	162	337	159	143	106	mmu:171212	Polypeptide N-acetylgalactosaminyltransferase 10
Hexb	737.499	343.374	2.1478	1.10286	0.000758759	0.0280733	826	453	966	271	408	361	mmu:15212	Beta-hexosaminidase subunit beta
Lilrb4	326.03	151.99	2.14508	1.10103	0.000111606	0.00730494	361	218	408	225	116	133	mmu:14728	Leukocyte immunoglobulin-like receptor subfamily B member 4
AI607873	507.912	237.09	2.14227	1.09914	0.000152559	0.00921741	615	304	636	207	278	237	mmu:226691	AI607873 protein
Cebpd	150.936	70.6482	2.13644	1.09521	0.000641753	0.0252949	188	130	134	70	57	86	mmu:12609	CCAAT/enhancer binding protein (C/EBP), delta
Itgb2	608.538	284.948	2.13561	1.09465	4.16513e-05	0.00356507	746	373	743	386	246	253	mmu:16414	Integrin beta-2
Prkab2	116.996	54.7896	2.13536	1.09448	0.000974733	0.032988	181	66	118	60	54	54	mmu:108097	5'-AMP-activated protein kinase subunit beta-2
Coro1a	359.682	169.219	2.12554	1.08783	8.4584e-05	0.00614415	410	228	456	194	200	132	mmu:12721	Coronin-1A
Fam111a	163.516	77.2873	2.11569	1.08113	0.000536002	0.0224769	231	103	170	93	77	69	mmu:107373	Protein FAM111A
Gbp6	333.688	158.034	2.1115	1.07827	5.79111e-05	0.00465714	477	226	322	154	154	172	mmu:100702	Protein Gbp6
Gpc1	454.551	215.958	2.10482	1.07369	6.5168e-05	0.00502099	487	354	519	227	219	215	mmu:14733	Glypican 1, isoform CRA_c
Zfp608	187.478	89.3568	2.09808	1.06907	0.000631746	0.0250134	234	156	173	113	79	84	mmu:269023	Zinc finger protein 608
Epha2	555.405	264.88	2.09682	1.0682	8.012e-05	0.00594151	657	501	494	299	324	201	mmu:13836	Ephrin type-A receptor 2
Lrrc25	155.672	74.2808	2.09573	1.06745	0.00086048	0.0301703	186	105	182	78	86	65	mmu:211228	Leucine-rich repeat-containing protein 25
Hmgn2	458.189	218.742	2.09465	1.06671	3.79741e-05	0.0032825	639	329	432	156	300	209	mmu:15331	Non-histone chromosomal protein HMG-17
Cd52	359.415	171.887	2.091	1.06419	0.000682254	0.0262977	375	243	466	168	237	128	mmu:23833	CAMPATH-1 antigen
Emr1	1001.64	480.093	2.08634	1.06098	2.18075e-05	0.00213921	1155	728	1140	592	415	471	mmu:13733	Emr1
Spi1	287.421	138.167	2.08024	1.05675	0.00129628	0.0398313	297	185	387	162	155	112	mmu:20375	Transcription factor PU.1
Ppip5k1	135.531	65.5405	2.06789	1.04816	0.00113602	0.0362634	185	81	152	62	79	60	mmu:327655	Inositol hexakisphosphate and diphosphoinositol-pentakisphosphate kinase 1
Nrros	209.151	101.589	2.05879	1.04179	0.000758869	0.0280733	244	158	228	136	106	76	mmu:224109	Negative regulator of reactive oxygen species
Anxa1	154.365	75.3521	2.04858	1.03462	0.00149911	0.043834	196	114	158	94	83	58	mmu:16952	Annexin A1
Uba7	309.738	151.313	2.04701	1.03352	0.000216791	0.012116	364	239	329	175	123	164	mmu:74153	Protein Uba7
Cd274	163.475	79.8726	2.0467	1.0333	0.00155017	0.0447396	202	131	159	105	86	59	mmu:60533	PD-L1
Alg12	177.201	86.5868	2.04652	1.03317	0.000864154	0.0302385	253	121	170	115	85	70	mmu:223774	Dol-P-Man:Man(7)GlcNAc(2)-PP-Dol alpha-1,6-mannosyltransferase
Clec9a	133.321	65.184	2.0453	1.03231	0.00167373	0.0472896	175	73	164	54	71	72	mmu:232414	C-type lectin domain family 9 member A
Rassf2	148.597	72.8283	2.04037	1.02883	0.00171517	0.0478728	158	99	192	86	80	60	mmu:215653	Ras association domain-containing protein 2
Hck	289.283	141.83	2.03964	1.02832	0.000287601	0.0146836	360	188	335	185	136	120	mmu:15162	Non-specific protein-tyrosine kinase
Rap2b	140.887	69.305	2.03285	1.0235	0.0016621	0.0470372	174	91	165	71	85	58	mmu:74012	Ras-related protein Rap-2b
Soat1	216.826	107.288	2.02097	1.01505	0.000714581	0.0271837	253	146	259	151	83	99	mmu:20652	Sterol O-acyltransferase 1
Slc11a1	412.078	204.208	2.01793	1.01288	0.00125424	0.0391307	433	265	549	243	230	162	mmu:18173	Natural resistance-associated macrophage protein 1
Fam129a	434.535	215.555	2.01589	1.01142	0.00180518	0.0496383	481	263	579	274	222	175	mmu:63913	Protein Niban
LOC101056219	1687.05	837.424	2.01456	1.01047	3.65764e-05	0.0031933	2222	1375	1494	849	1067	674	mmu:101056219	uncharacterized LOC101056219
Oxct1	213.783	106.196	2.0131	1.00942	0.000611572	0.0244363	278	129	250	100	150	79	mmu:67041	Succinyl-CoA:3-ketoacid CoA transferase
Iqgap1	1011.03	502.859	2.01056	1.0076	0.000158664	0.00955324	1270	616	1213	714	465	395	mmu:29875	Iqgap1 protein
Slc38a2	2008.56	4022.87	0.499285	-1.00207	3.71849e-05	0.00323027	2696	1661	1705	5141	3372	3896	mmu:67760	Putative uncharacterized protein
Gm7120	114.138	228.945	0.498541	-1.00422	0.00105817	0.0346655	139	74	135	253	248	205	mmu:633640	Transmembrane protein C5orf28 homolog
Haus4	147.98	297.784	0.49694	-1.00886	0.000159953	0.00956484	120	156	150	407	272	249	mmu:219072	HAUS augmin-like complex subunit 4
Slc17a2	2323.36	4677.02	0.496761	-1.00938	0.00125498	0.0391307	2536	2106	2235	7030	3776	3836	mmu:218103	Sodium-dependent phosphate transport protein 3
Naa30	279.595	563.585	0.496102	-1.01129	0.00179664	0.0494813	489	185	199	741	478	525	mmu:70646	Nat12 protein
Cfhr3	177.68	358.917	0.495043	-1.01437	0.000124712	0.00797525	140	176	198	441	345	324	mmu:624286	Putative uncharacterized protein
Klkb1	4280.43	8689.01	0.492625	-1.02144	5.98519e-06	0.000836059	3324	4757	4153	8928	9378	8331	mmu:16621	Plasma kallikrein
Mir22hg	753.733	1530.63	0.492432	-1.022	2.00346e-05	0.00202211	470	730	967	1666	1534	1495	mmu:100042498	Mir22 host gene (non-protein coding)
Zfp707	295.912	601.737	0.491763	-1.02396	0.000308683	0.0153997	358	290	227	666	788	423	mmu:69020	Protein Zfp707
Cbs	3486.55	7094.52	0.491442	-1.02491	0.000568257	0.0231004	3385	3675	3058	7615	9442	5043	mmu:12411	Cystathionine beta-synthase
Epb4.1l4b	1389.29	2827.08	0.491421	-1.02497	9.2992e-06	0.0011686	1421	1498	1114	3377	2889	2482	mmu:54357	Band 4.1-like protein 4B
Stbd1	1656.16	3384.19	0.489382	-1.03097	1.92566e-05	0.001972	2190	1456	1324	4258	3069	3133	mmu:52331	Stbd1 protein
Mn1	168.295	344.571	0.488419	-1.03381	0.000143951	0.00888172	198	157	144	403	421	251	mmu:433938	Protein Mn1
Cyp2f2	11720.4	24030.8	0.487725	-1.03586	0.00126466	0.0392273	6118	9473	18447	26956	28497	19125	mmu:13107	Cytochrome P450 2F2
Gstt2	822.464	1689.24	0.486883	-1.03835	1.05956e-05	0.00128479	594	703	1105	1942	1964	1341	mmu:14872	Glutathione S-transferase theta-2
Tle1	521.994	1072.58	0.486669	-1.03899	3.06815e-05	0.00282658	668	478	412	1316	1033	968	mmu:21885	Transducin-like enhancer protein 1
1700066M21Rik	354.877	731.204	0.485332	-1.04296	0.000404245	0.0184778	403	368	269	1037	596	643	mmu:73467	UPF0565 protein C2orf69 homolog
Fzd6	105.679	219.712	0.480989	-1.05592	0.00101112	0.0336288	150	55	124	212	260	202	mmu:14368	Putative uncharacterized protein
Cyp4a10	8664.34	18013.6	0.480989	-1.05593	0.000447025	0.0199629	10003	7182	8724	26828	17611	12376	mmu:13117	Cytochrome P450 4A10
Txnrd3	108.528	226.367	0.479435	-1.06059	0.000281666	0.0144652	108	101	110	293	202	206	mmu:232223	Thioredoxin reductase 3
Cps1	26078.5	54413.9	0.479262	-1.06111	0.00102227	0.0337984	11327	29517	32250	54020	56894	55185	mmu:227231	Cps1 protein
Nr1d2	1476.3	3090.81	0.477643	-1.06599	0.000456326	0.0201605	1670	1467	1206	3859	2350	3267	mmu:353187	Nuclear receptor subfamily 1, group D, member 2, isoform CRA_b
Scamp1	895.813	1877.71	0.477077	-1.0677	1.2506e-05	0.00138207	1131	782	769	2303	1804	1699	mmu:107767	Secretory carrier-associated membrane protein 1
Tbc1d30	130.715	274.444	0.476289	-1.07009	0.00152969	0.0443687	220	108	73	252	299	284	mmu:74694	TBC1 domain family member 30
Rnf138	163.762	344.595	0.475231	-1.0733	0.000265566	0.0139348	288	125	94	390	343	327	mmu:56515	E3 ubiquitin-protein ligase RNF138
Fcna	673.081	1418.58	0.474477	-1.07559	0.00106135	0.0347045	463	752	699	1991	1125	1290	mmu:14133	Ficolin-1
Cyp2r1	140.687	298.844	0.47077	-1.08691	9.53611e-05	0.0066604	112	118	183	386	265	274	mmu:244209	Vitamin D 25-hydroxylase
Gtf2ird2	86.3044	183.506	0.470308	-1.08832	0.000620196	0.024668	125	67	71	246	169	156	mmu:114674	General transcription factor II-I repeat domain-containing protein 2
Rpp40	99.4883	213.84	0.465246	-1.10393	0.000273776	0.0142143	123	74	104	253	269	147	mmu:208366	Ribonuclease P protein subunit p40
Plekhb1	621.346	1339.12	0.463995	-1.10782	0.00017528	0.0102704	575	604	634	1974	1187	1039	mmu:27276	Pleckstrin homology domain-containing family B member 1
Wdtc1	1447.33	3140.86	0.460806	-1.11777	1.46317e-06	0.000274714	1422	1378	1443	3994	3508	2318	mmu:230796	WD and tetratricopeptide repeats protein 1
Elovl2	4888.23	10704	0.456672	-1.13077	1.06046e-06	0.000211353	5970	4690	3830	13438	12274	7765	mmu:54326	Elongation of very long chain fatty acids protein 2
Bag4	551.467	1213.18	0.454563	-1.13745	2.43982e-06	0.000421799	551	558	500	1623	1026	1111	mmu:67384	BCL2-associated athanogene 4
Cyp4f14	1676.57	3704.74	0.452547	-1.14386	0.00137183	0.0412281	1236	2350	1063	3545	4248	3544	mmu:64385	Leukotriene-B4 omega-hydroxylase 3
Lifr	2373.3	5279.2	0.449557	-1.15342	8.00035e-07	0.000166302	2630	2661	1600	5611	5267	5281	mmu:16880	Leukemia inhibitory factor receptor
Slc22a30	1375.26	3064.82	0.448726	-1.15609	0.000147466	0.00906657	1421	1550	1005	3983	2429	3035	mmu:319800	Protein Slc22a30
Capn10	224.857	501.98	0.44794	-1.15862	1.25985e-05	0.00138353	183	202	272	704	501	370	mmu:23830	Calpain-10
Mtx3	330.466	739.917	0.446626	-1.16286	7.22713e-06	0.000985882	364	269	354	798	787	690	mmu:382793	Protein Mtx3
Slc35g1	549.87	1238.21	0.444084	-1.1711	1.1966e-05	0.00135262	563	437	639	1785	1172	929	mmu:240660	Solute carrier family 35 member G1
C8b	3925.71	9066.69	0.432982	-1.20762	1.52737e-05	0.00163616	5825	4272	1551	9813	9998	8129	mmu:110382	Complement component 8 beta subunit
Cyp2c50	7943.8	18612.8	0.426793	-1.22839	0.000384037	0.0177869	3794	9912	8357	19107	17496	20049	mmu:107141	Cytochrome P450 2C50
Klb	448.138	1053.96	0.425195	-1.2338	7.15882e-07	0.000152439	522	418	388	1395	929	945	mmu:83379	Beta-klotho
Zc3h6	49.6763	116.993	0.424609	-1.23579	0.000350944	0.0167886	32	48	63	111	129	117	mmu:78751	Zinc finger CCCH domain-containing protein 6
Jade1	540.277	1276.54	0.423235	-1.24047	6.19224e-07	0.000138619	628	518	451	1625	1043	1264	mmu:269424	Protein Jade-1
LOC102636154	60.7594	143.577	0.423183	-1.24065	8.24569e-05	0.00604949	36	64	73	175	172	102	mmu:102636154	uncharacterized LOC102636154
Rnr2	6548.73	15523.4	0.421861	-1.24516	0.000175105	0.0102704	6019	7459	5325	16599	13135	17438	mmu:17725	16S ribosomal RNA
Ano1	33.7666	81.6063	0.413774	-1.27308	0.00160279	0.0456546	41	18	45	118	76	62	mmu:101772	Anoctamin-1
Keg1	1174.35	2839.29	0.413606	-1.27367	0.00153756	0.0444491	447	1714	1016	3121	2524	3021	mmu:64697	Glycine N-acyltransferase-like protein Keg1
Gm4952	1651.59	3995.35	0.413378	-1.27447	2.83607e-07	6.69198e-05	2589	1244	1239	4367	4658	3336	mmu:240549	Glycine N-acyltransferase-like protein
Pcsk4	207.72	504.544	0.411698	-1.28034	0.00022929	0.0126298	168	215	216	513	432	583	mmu:18551	Proprotein convertase subtilisin/kexin type 4
D130043K22Rik	112.81	275.027	0.410179	-1.28568	4.28351e-06	0.000623287	72	115	136	349	264	240	mmu:210108	Protein D130043K22Rik
Fgfr2	549.344	1345.73	0.408213	-1.29261	8.4181e-05	0.00614415	771	388	522	1703	1692	840	mmu:14183	Fibroblast growth factor receptor 2
LOC102638888	33.7646	83.4054	0.404826	-1.30463	0.000770831	0.0282849	33	32	34	87	103	68	mmu:102638888	uncharacterized LOC102638888
Ugt2b37	30.3587	75.1179	0.404148	-1.30705	0.000847843	0.0298471	20	31	36	101	64	68	mmu:112417	Protein Ugt2b37
Rapgef4	2312.91	5778.59	0.400256	-1.32101	5.0472e-08	1.46882e-05	3073	1836	2088	7485	5330	5108	mmu:56508	Rapgef4 protein
Slc25a25	1574.58	3943.98	0.399236	-1.32469	3.17542e-08	9.55966e-06	1708	1497	1435	4224	4203	3694	mmu:227731	Calcium-binding mitochondrial carrier protein SCaMC-2
Csrnp1	103.249	259.476	0.397913	-1.32948	4.37041e-06	0.000630675	105	110	85	294	276	231	mmu:215418	Cysteine/serine-rich nuclear protein 1
Cyp2c29	6431.66	16164.3	0.397894	-1.32955	4.44077e-05	0.00374648	3754	7080	7387	14671	17055	17329	mmu:13095	Cytochrome P450 2C29
Pgap1	334.859	841.841	0.39777	-1.32999	0.000539962	0.0225018	493	295	224	1177	599	827	mmu:241062	Putative uncharacterized protein
Slc7a2	6952	17491.1	0.397459	-1.33112	6.53924e-09	2.33024e-06	5510	7689	6697	18845	18231	16641	mmu:11988	Cationic amino acid transporter 2A
Sgk2	831.114	2091.78	0.397324	-1.33161	1.15506e-05	0.00134457	757	736	950	2513	2678	1369	mmu:27219	Putative uncharacterized protein
Cyp2c67	2639.76	6653.11	0.39677	-1.33362	7.08239e-07	0.000152439	4346	1911	1901	8165	5717	6586	mmu:545288	Cytochrome P450, family 2, subfamily c, polypeptide 67
Syt1	179.963	457.091	0.393714	-1.34478	1.50467e-05	0.00162179	155	224	131	485	418	490	mmu:20979	Synaptotagmin-1
5830473C10Rik	567.02	1444.94	0.392418	-1.34954	9.09824e-06	0.00116812	638	529	510	1444	1949	1088	mmu:622307	Protein 5830473C10Rik
LOC102640757	53.6192	142.026	0.377532	-1.40533	1.23989e-05	0.00138207	42	68	41	163	171	108	mmu:102640757	uncharacterized LOC102640757
Cyp3a25	9286.73	24616.9	0.377249	-1.40641	1.04636e-07	2.81084e-05	4077	9169	13157	26259	28161	21511	mmu:56388	MCG115420, isoform CRA_b
Ppargc1b	183.934	489.587	0.375693	-1.41237	3.07571e-05	0.00282658	175	151	219	425	501	553	mmu:170826	Peroxisome proliferative activated receptor, gamma, coactivator 1 beta
Reck	39.0426	105.054	0.371645	-1.428	0.000110461	0.00727833	43	34	39	145	85	96	mmu:53614	Reck protein
Sort1	224.21	603.458	0.371542	-1.4284	1.66511e-07	4.2137e-05	371	152	173	772	669	446	mmu:20661	Sortilin
Fabp1	19712.6	53342.4	0.369548	-1.43617	2.14295e-08	7.06002e-06	15051	24043	16625	70440	50618	44914	mmu:14080	Fatty acid-binding protein, liver
Slc6a16	25.9621	70.483	0.368346	-1.44087	0.00104652	0.0343482	11	43	15	69	87	61	mmu:381884	solute carrier family 6, member 16
Ces3b	2983.41	8152.11	0.365968	-1.45021	0.000206936	0.0116936	1165	4827	1954	8603	9485	7061	mmu:13909	Carboxylesterase 3B
Gm9992	24.5096	67.0329	0.365636	-1.45152	0.000523459	0.0221836	22	29	19	81	58	67	mmu:667055	Protein Gm9992
Kcp	42.0888	116.292	0.361922	-1.46625	3.32696e-05	0.00297908	36	35	53	163	117	85	mmu:333088	Kielin/chordin-like protein
Nox4	797.461	2213.71	0.360237	-1.47298	2.575e-05	0.00245694	582	966	704	2479	1814	2450	mmu:50490	NADPH oxidase 4 splice variant
Serpina3k	75885.8	210713	0.360138	-1.47338	8.62716e-09	3.01278e-06	68041	99236	46857	240668	206395	201080	mmu:20714	Serine protease inhibitor A3K
Cyp2u1	65.0166	181.062	0.359084	-1.47761	3.46657e-06	0.000535661	80	69	42	183	238	140	mmu:71519	Cytochrome P450 2U1
Nudt7	3239.59	9074.5	0.356999	-1.48601	0.000445755	0.0199573	2104	4997	1716	8867	8665	10008	mmu:67528	Peroxisomal coenzyme A diphosphatase NUDT7
Pck1	23909.6	67809.4	0.3526	-1.5039	5.13846e-11	2.80383e-08	18428	26628	23245	84543	64766	60613	mmu:18534	Putative uncharacterized protein
Dbp	929.339	2659.11	0.349492	-1.51667	3.3903e-06	0.000533316	633	1180	790	3205	2192	2756	mmu:13170	D site-binding protein
Cyp2c37	3961.17	11354.4	0.348868	-1.51925	6.70146e-05	0.0051322	2320	3660	5435	15305	8301	11408	mmu:13096	Cytochrome P450 2C37
Lrrc16a	260.814	751.866	0.346889	-1.52745	0.000105051	0.00705499	185	410	115	769	740	784	mmu:68732	Leucine-rich repeat-containing protein 16A
C6	1686.01	4882.52	0.345316	-1.53401	1.34829e-06	0.000258708	1677	2331	739	6430	4847	3944	mmu:12274	Protein C6
Aox3	6239.7	18205	0.342747	-1.54478	2.26186e-11	1.36187e-08	5438	6901	5590	22509	18540	15446	mmu:71724	Aldehyde oxidase 3
Alas2	885.09	2608.51	0.339309	-1.55933	1.53282e-10	7.87192e-08	506	1080	891	3146	2907	2063	mmu:11656	5-aminolevulinate synthase, erythroid-specific, mitochondrial
Dtx3l	349.065	1032.65	0.338029	-1.56478	7.81331e-05	0.00588053	460	286	307	1597	969	698	mmu:209200	Dtx3l protein
E130012A19Rik	17.4822	52.0575	0.335824	-1.57422	0.000771068	0.0282849	13	19	18	52	61	47	mmu:103551	Uncharacterized protein C17orf96 homolog
9030616G12Rik	76.5132	228.697	0.334561	-1.57966	1.69527e-05	0.0017832	74	77	72	277	301	141	mmu:77699	RIKEN cDNA 9030616G12 gene
Cd276	42.921	130.15	0.329781	-1.60042	0.00157542	0.0450958	56	22	55	212	117	84	mmu:102657	CD276 antigen
Cyp2d9	7146.54	21698.6	0.329355	-1.60229	1.91257e-05	0.001972	2485	8278	9126	27821	16860	22065	mmu:13105	Cytochrome P450 2D9
Tspan33	96.9918	300.665	0.322591	-1.63222	0.00142694	0.0422301	115	115	51	365	425	160	mmu:232670	Tetraspanin-33
Fbxo21	1316.14	4103.64	0.320726	-1.64059	1.23605e-11	7.99361e-09	1314	1368	1148	4480	5139	3131	mmu:231670	Putative uncharacterized protein
Dpy19l3	120.152	375.72	0.319791	-1.6448	1.11651e-05	0.00132611	99	149	92	559	323	296	mmu:233115	Probable C-mannosyltransferase DPY19L3
Spsb4	28.2687	88.9779	0.317705	-1.65424	0.00170439	0.0476928	22	38	19	84	134	59	mmu:211949	SPRY domain-containing SOCS box protein 4
LOC102637425	28.0413	89.5208	0.313237	-1.67467	1.20071e-05	0.00135262	13	38	26	83	94	95	mmu:102637425	uncharacterized LOC102637425
Mcm10	482.891	1584.6	0.30474	-1.71435	8.09639e-13	6.14657e-10	312	639	392	1700	1717	1458	mmu:70024	Protein MCM10 homolog
LOC102639210	44.7315	149.313	0.299581	-1.73898	4.72347e-07	0.000107112	62	49	21	187	127	146		isopentenyl-diphosphate Delta-isomerase 1-like
Prok1	33.2896	111.215	0.299326	-1.74021	0.000196334	0.0112011	68	27	9	99	149	94	mmu:246691	Prokineticin-1
Mtl5	10.3797	35.6974	0.290769	-1.78205	0.0011307	0.0361597	5	16	7	30	39	39	mmu:17771	MCG3887, isoform CRA_a
Gm21049	17.149	59.8121	0.286715	-1.80231	9.28596e-05	0.00653835	20	19	11	76	54	55		UDP glucuronosyltransferase 2 family, polypeptide B36 pseudogene
Mup3	32826.6	114654	0.28631	-1.80435	2.87577e-06	0.000473715	11323	55629	19572	131641	104805	115213	mmu:17842	Major urinary protein 3
Cyp2c54	2256.52	7938.85	0.284237	-1.81483	9.99793e-05	0.00678434	1140	3810	1054	7123	7958	8928	mmu:404195	Cytochrome P450 2C54
LOC102639762	15.1975	54.6897	0.277886	-1.84744	5.86264e-05	0.00467431	4	18	20	60	75	36	mmu:102639762	uncharacterized LOC102639762
LOC102637122	10.7721	39.5382	0.272449	-1.87594	0.00076906	0.0282849	18	9	6	51	52	22	mmu:102637122	uncharacterized LOC102637122
Trhde	17.9361	65.8825	0.272244	-1.87703	1.15424e-05	0.00134457	1	25	22	81	52	69	mmu:237553	Putative uncharacterized protein
Raet1e	102.26	376.736	0.271437	-1.88131	1.76055e-06	0.000316917	128	71	112	392	310	439	mmu:379043	Retinoic acid early transcript 1E
Igfbp2	3302.89	12274.7	0.269082	-1.89388	0.000584928	0.0235332	6760	2151	1554	12117	17977	8159	mmu:16008	Insulin-like growth factor-binding protein 2
Ugt2b38	122.625	459.035	0.267137	-1.90435	0.00169293	0.0474483	133	85	152	644	244	519	mmu:100559	MCG131371
Mup12	6768	25574.3	0.264641	-1.91789	0.000924248	0.0318127	346	15766	262	27004	32750	19611	mmu:100039054	Major urinary protein 1
Cyp2j9	138.74	535.875	0.258903	-1.94952	6.31109e-08	1.77739e-05	43	162	180	569	701	396	mmu:74519	Cytochrome P450 CYP2J9
Sox12	33.1198	131.892	0.251114	-1.99359	1.30216e-05	0.00142106	34	29	35	206	128	84	mmu:20667	Transcription factor SOX-12
TrnT	40.3044	165.847	0.243022	-2.04084	9.66111e-06	0.0011884	26	50	37	249	178	99	mmu:17744	tRNA
Dact2	79.2342	328.189	0.241428	-2.05033	8.50944e-05	0.00614415	84	98	45	404	456	177	mmu:240025	Dapper homolog 2
Gm5626	29.1172	123.019	0.236689	-2.07893	8.89751e-06	0.00115081	36	22	30	138	173	75		stomatin (Epb7.2)-like 2 pseudogene
Capn8	15.8153	70.5114	0.224294	-2.15654	6.96188e-07	0.000151952	13	26	4	92	66	61	mmu:170725	Calpain-8
Gnai1	36.2148	164.073	0.220723	-2.17969	0.000568749	0.0231004	61	23	29	260	96	155	mmu:14677	Guanine nucleotide-binding protein G(i) subunit alpha-1
Cyp2c44	1577.35	7393.81	0.213334	-2.22881	1.50597e-19	2.39052e-16	1775	1421	1483	8624	7844	6409	mmu:226143	Protein Cyp2c44
Nr1d1	457.578	2156.07	0.212228	-2.23631	7.04307e-19	1.02483e-15	383	570	342	2339	2645	1703	mmu:217166	Nuclear receptor subfamily 1 group D member 1
Ces2a	1363.52	6849.11	0.199079	-2.32859	2.5788e-22	5.62856e-19	344	1502	1951	7532	7603	6006	mmu:102022	Pyrethroid hydrolase Ces2a
Cyp2g1	20.5595	104.11	0.197479	-2.34023	3.59694e-06	0.000550901	6	24	27	82	109	122	mmu:13108	Protein Cyp2g1
Srd5a1	411.132	2132.42	0.192801	-2.37482	1.05288e-12	7.66013e-10	328	491	348	2587	2652	1442	mmu:78925	Srd5a1 protein
Cyp4a12a	902.223	4703.95	0.191801	-2.38232	3.06327e-10	1.48577e-07	171	1674	473	5440	5737	3483	mmu:277753	Cytochrome P450 4A12A
Cyp3a11	13788.1	72004.3	0.19149	-2.38466	5.31649e-17	5.15729e-14	7376	8419	25020	95476	67099	61360	mmu:13112	MCG15287
Mup21	347.827	1850.15	0.187999	-2.4112	2.14737e-05	0.0021377	418	407	185	1379	2704	1581	mmu:381531	Putative novel major urinary protein (Mup)
Mup19	332.547	1826.42	0.182076	-2.45739	3.8571e-11	2.17254e-08	15	666	153	1826	1980	1783	mmu:100189605	OTTMUSP00000022937
Dlgap1	11.5486	64.7745	0.178289	-2.48771	5.14924e-05	0.00426118	8	16	8	42	89	65	mmu:224997	Disks large-associated protein 1
Ugt2b1	2219.41	12541.1	0.176971	-2.49842	2.56133e-25	7.45389e-22	1277	2947	1923	13763	13324	11524	mmu:71773	Protein Ugt2b1
Cyp7b1	1089.99	6214.87	0.175384	-2.51141	1.77326e-17	1.82135e-14	916	1432	717	6935	5504	6550	mmu:13123	Putative uncharacterized protein
Gm21320	11932.9	69521.7	0.171643	-2.54252	0.000305497	0.0153284	541	26390	2314	102948	37248	74164	mmu:100861909	Major urinary protein 1
LOC102639366	8.08058	48.1275	0.167899	-2.57433	0.00125997	0.0392164	5	5	14	87	39	28	mmu:102639366	uncharacterized LOC102639366
Spink5	3.72249	22.7652	0.163516	-2.61249	0.000492633	0.0213495	2	6	2	26	35	11	mmu:72432	Serine peptidase inhibitor, Kazal type 5
Mup11	3097.83	19493	0.15892	-2.65363	1.4641e-07	3.7595e-05	501	6491	751	29334	18579	13562	mmu:100039028	Major urinary protein 9
Smad9	84.3707	578.072	0.145952	-2.77644	1.52938e-17	1.7803e-14	195	57	18	780	546	476	mmu:55994	Mothers against decapentaplegic homolog 9
Serpina1e	25288.7	181502	0.139331	-2.84342	0.000806258	0.0289672	70860	12287	896	149718	295846	118094	mmu:20704	Alpha-1-antitrypsin 1-5
LOC102638528	2.89254	21.1828	0.136551	-2.87249	0.000474333	0.0207577	0	3	5	12	31	21	mmu:102638528	uncharacterized LOC102638528
Gm13251	19.2653	147.384	0.130715	-2.9355	8.5159e-11	4.50595e-08	35	14	11	145	131	170	mmu:433791	Protein Gm13251
Jph1	11.164	85.5839	0.130445	-2.93848	0.00121503	0.0382264	16	5	14	149	40	79	mmu:57339	Junctophilin-1
Cadm4	25.6875	207.278	0.123928	-3.01243	1.95506e-18	2.62594e-15	18	40	12	254	245	149	mmu:260299	Cell adhesion molecule 4
LOC102631886	3.16187	26.3348	0.120064	-3.05812	3.27163e-05	0.00295989	0	6	2	31	18	31	mmu:102631886	uncharacterized LOC102631886
Hhip	13.9284	118.074	0.117963	-3.08359	0.000106623	0.0071059	15	17	8	203	67	101	mmu:15245	Hedgehog-interacting protein
Serpina4-ps1	28.8072	247.694	0.116302	-3.10406	1.08633e-06	0.000213128	17	45	16	367	147	252	mmu:321018	serine (or cysteine) peptidase inhibitor, clade A, member 4, pseudogene 1
LOC102640678	17.5669	152.935	0.114865	-3.12199	2.41516e-08	7.80945e-06	25	19	8	178	213	90	mmu:102640678	uncharacterized LOC102640678
1700039E15Rik	1.91442	17.2327	0.111092	-3.17017	0.0010443	0.0343401	3	1	2	24	17	13	mmu:76713	Transporter
Susd4	109.779	1010.21	0.108669	-3.20199	1.04688e-32	6.09316e-29	58	198	33	1182	972	957	mmu:96935	Sushi domain-containing protein 4
Serpine2	53.8946	503.73	0.106991	-3.22444	1.543e-25	5.38847e-22	76	27	65	570	614	383	mmu:20720	Glia-derived nexin
Bhlhe41	15.2292	143.019	0.106484	-3.23129	2.87715e-13	2.28354e-10	19	19	6	207	148	96	mmu:79362	Class E basic helix-loop-helix protein 41
Raet1d	106.837	1059.97	0.100792	-3.31054	1.45848e-06	0.000274714	57	88	165	1120	717	1353	mmu:56554	Retinoic acid early transcript 1D
LOC102633852	2.98249	29.6267	0.100669	-3.31231	9.33359e-05	0.00654513	5	3	1	51	29	15	mmu:102633852	complement component C6-like
Mup8	5.62034	56.0034	0.100357	-3.31678	9.2811e-06	0.0011686	1	12	1	56	39	73	mmu:100041687	Major urinary protein 5
Slc22a28	19.5913	203.106	0.0964585	-3.37395	3.7917e-10	1.78938e-07	27	28	1	270	139	215	mmu:434674	Protein Slc22a28
Ces4a	2.97691	33.4271	0.089057	-3.48913	0.00011212	0.00730494	2	5	1	58	18	29	mmu:234677	Carboxylesterase 4A
Mup7	10596.8	120538	0.0879129	-3.50778	1.06518e-06	0.000211353	631	24828	152	159551	66693	141470	mmu:100041658	Protein Mup7
LOC102638811	1.31161	14.9237	0.0878879	-3.50819	0.000965505	0.032799	0	0	4	24	18	6	mmu:102638811	uncharacterized LOC102638811
LOC102631624	7.04405	85.8316	0.0820683	-3.60703	0.000786266	0.0287217	13	5	4	74	151	44	mmu:102631624	uncharacterized LOC102631624
Cyp2c40	27.4941	348.653	0.0788581	-3.6646	2.67227e-09	1.08513e-06	35	18	31	270	499	299	mmu:13099	Cytochrome P450 2C40
Ranbp3l	1.95102	26.3666	0.0739958	-3.75641	0.000553471	0.0227392	1	4	0	45	10	27	mmu:223332	Ran-binding protein 3-like
Selenbp2	285.139	3970.63	0.071812	-3.79963	1.29004e-13	1.07263e-10	205	319	288	4453	5452	2533	mmu:20342	Selenium-binding protein 2
Cyp26a1	54.3557	758.396	0.0716719	-3.80245	3.05784e-37	2.66965e-33	49	58	50	902	718	717	mmu:13082	Cytochrome P450 26A1
Grm8	6.10776	85.8891	0.0711122	-3.81376	5.7315e-09	2.12931e-06	7	6	5	81	127	59	mmu:14823	Glutamate receptor, metabotropic 8
Cyp2c69	9.51909	134.638	0.0707013	-3.82212	6.80636e-08	1.88644e-05	18	6	6	113	203	100	mmu:100043108	Protein Cyp2c69
Mup1	246.61	3589.3	0.068707	-3.8634	0.000654005	0.0256883	46	547	16	5882	952	4210	mmu:17840	Major urinary protein 1
Ntrk1	4.28852	66.8543	0.0641473	-3.96247	2.73528e-08	8.68376e-06	2	5	5	103	42	63	mmu:18211	High affinity nerve growth factor receptor
LOC102640119	1.49116	29.5392	0.0504807	-4.30812	2.73397e-07	6.63026e-05	0	2	2	22	34	33	mmu:102640119	uncharacterized LOC102640119
LOC102634858	5.3566	115.701	0.0462969	-4.43294	5.19044e-20	9.06302e-17	4	7	4	124	113	117	mmu:102634858	uncharacterized LOC102634858
Cyp4a12b	74.622	1741.61	0.0428466	-4.54468	9.02836e-14	7.88221e-11	108	63	55	2370	2175	971	mmu:13118	Protein Cyp4a12b
Gm3839	16.6614	448.18	0.0371758	-4.74949	6.5271e-07	0.000144265	9	26	10	306	734	338		Glyceraldehyde-3-phosphate dehydrogenase
Mup14	535.392	15146.5	0.0353475	-4.82225	2.60584e-06	0.000441752	27	1259	6	25213	6184	15633	mmu:100039116	Major urinary protein 12
LOC102639616	1.67071	57.8429	0.0288835	-5.11361	2.57432e-14	2.3658e-11	0	4	0	71	50	57	mmu:102639616	uncharacterized LOC102639616
LOC102633249	0.417677	14.6026	0.0286029	-5.12769	9.74457e-05	0.00677888	0	1	0	8	21	15	mmu:102633249	uncharacterized LOC102633249
Clec2h	16.192	674.27	0.0240141	-5.37997	0.00010013	0.00678434	0	16	29	428	1266	397	mmu:94071	C-type lectin-domain family 2 member H
Slco1a1	143.66	6102.21	0.0235423	-5.4086	4.2531e-09	1.6878e-06	112	268	1	8254	3033	7315	mmu:28248	Solute carrier organic anion transporter family member 1A1
Ptprt	0.417677	17.9899	0.0232173	-5.42866	8.74958e-06	0.00114257	0	1	0	25	9	21	mmu:19281	Protein-tyrosine-phosphatase
Cd163	13.8128	620.097	0.0222753	-5.48841	7.4465e-12	5.20094e-09	13	11	17	938	368	616	mmu:93671	Cd163 protein
Mup13	224.601	10820.3	0.0207573	-5.59023	8.03259e-05	0.00594151	6	529	6	21489	3506	9245	mmu:100039089	Major urinary protein 11
Hsd3b5	25.2847	4259.61	0.00593591	-7.39632	1.27129e-111	2.21979e-107	19	47	1	4586	4260	4207	mmu:15496	3 beta-hydroxysteroid dehydrogenase type 5
Mup-ps18	1.72929	789.279	0.00219097	-8.83422	0.000504864	0.0216595	0	1	4	1815	2	697		major urinary protein, pseudogene 18
